# Supplementary material
Source: publisher figshare collection journal article supplement (https://sage.figshare.com/ndownloader/files/13316498)
Supplement: Supplementary file 1 [file 13316498]

## Supplemental 1 – Results table summarising efficacy and safety measures of defined biological regimens

| Author Design<br><sup>a</sup> n (plus % female pts)<br>Biological intervention                              | Indication for<br><sup>a</sup> RTX/ <sup>b</sup> BMB                                    | Length of follow-up                        | Efficacy                                                                                                                                                                                                                                                                                                                                                                                                                                                                                                                                                                                                                                                                                                                                                                                                                                                                                                                                                                                                                                                                                                                                                                                                                                                                                                                                                                                                                                                                                                                                                                                                                                                                                                                                                                                           | Safety                                                                                                                                                                                                                                                                                                                                                                                                                                                                                                                                                                                                                                                                                                                                                                                                                                                                                                                                                                                                                           | Level of Evidence |
|-------------------------------------------------------------------------------------------------------------|-----------------------------------------------------------------------------------------|--------------------------------------------|----------------------------------------------------------------------------------------------------------------------------------------------------------------------------------------------------------------------------------------------------------------------------------------------------------------------------------------------------------------------------------------------------------------------------------------------------------------------------------------------------------------------------------------------------------------------------------------------------------------------------------------------------------------------------------------------------------------------------------------------------------------------------------------------------------------------------------------------------------------------------------------------------------------------------------------------------------------------------------------------------------------------------------------------------------------------------------------------------------------------------------------------------------------------------------------------------------------------------------------------------------------------------------------------------------------------------------------------------------------------------------------------------------------------------------------------------------------------------------------------------------------------------------------------------------------------------------------------------------------------------------------------------------------------------------------------------------------------------------------------------------------------------------------------------|----------------------------------------------------------------------------------------------------------------------------------------------------------------------------------------------------------------------------------------------------------------------------------------------------------------------------------------------------------------------------------------------------------------------------------------------------------------------------------------------------------------------------------------------------------------------------------------------------------------------------------------------------------------------------------------------------------------------------------------------------------------------------------------------------------------------------------------------------------------------------------------------------------------------------------------------------------------------------------------------------------------------------------|-------------------|
| AIE'd (2014)<br><sup>b</sup> SRG<br><sup>a</sup> n = 16 (81% F)<br><sup>a</sup> RTX (plus <sup>c</sup> CYC) | Active disease refractory to conventional treatment – LN was the most common indication | Mean: 4.6 years<br><br>Range: 1.2-13 years | <p><i>Clinical response:</i></p> <ul style="list-style-type: none"> <li><sup>c</sup>SLEDAI ↓ from 15.31 ± 8.55 to 6.56 ± 4.98 at 6 months (p = 0.0002)</li> </ul> <p><i><sup>d</sup>CS reduction (mg/kg):</i></p> <ul style="list-style-type: none"> <li>Mean <sup>d</sup>CS dose ↓ from 0.3 ± 0.19 to 0.14 ± 0.11 at 6 months (p = 0.005)</li> </ul> <p><i>C3 and C4 levels (g/l):</i></p> <ul style="list-style-type: none"> <li>Mean C3 levels ↑ from 0.69 ± 0.36 to 1.03 ± 0.42 at 6 months (p = 0.003)</li> <li>Mean C4 levels ↑ from 0.11 ± 0.007 to 0.17 ± 0.12 at 6 months (p = 0.01)</li> </ul> <p><i>ESR (mm/h):</i></p> <ul style="list-style-type: none"> <li><sup>e</sup>NR</li> </ul> <p><i>Anti-dsDNA levels (IU/l):</i></p> <ul style="list-style-type: none"> <li>Mean anti-dsDNA ↓ from 1,082 ± 1,970 to 636 ± 1974 at 6 months (p value not statistically significant)</li> </ul> <p><i>Hb levels (g/l) and platelets (x 10<sup>9</sup>/l):</i></p> <ul style="list-style-type: none"> <li>Hb <sup>e</sup>NR</li> <li>1 pt with thrombocytopenia responded well (exact figures <sup>e</sup>NR)</li> </ul> <p><i>Renal outcomes:</i></p> <ul style="list-style-type: none"> <li>3 pts with class V nephritis had significant improvement in proteinuria (exact figures <sup>e</sup>NR)</li> <li>4 pts with class IV nephritis showed improvement of renal function (exact figures <sup>e</sup>NR)</li> <li>1 pt continued to have impaired renal function (exact figures <sup>e</sup>NR)</li> </ul> <p><i>B cell depletion:</i></p> <ul style="list-style-type: none"> <li><sup>e</sup>NR</li> </ul> <p><i>Relapses:</i></p> <ul style="list-style-type: none"> <li>NR; however, 4 patients required repeat cycles (2 pts required 2 cycles; 2 pts required 4 cycles)</li> </ul> | <p><i>Infusion reactions</i></p> <ul style="list-style-type: none"> <li>2 pts (13%) developed infusion-related anaphylactic reactions reported – 1 required therapy termination, 1 required slower infusion rate (exact timeframe not specified)</li> </ul> <p><i>Infections</i></p> <ul style="list-style-type: none"> <li>2 pts (13%) developed infections requiring hospital admission and IV antibiotics/antifungals (1 case of haemophilus influenza bacteraemia with simultaneous ankle osteomyelitis; 1 case of invasive fungal soft tissue infection) (exact timeframe not specified)</li> </ul> <p><i>Ig levels</i></p> <ul style="list-style-type: none"> <li><sup>e</sup>NR</li> </ul> <p><i>Withdrawals</i></p> <ul style="list-style-type: none"> <li>1 pt with an anaphylactic infusion reaction required therapy termination</li> </ul> <p><i>Other</i></p> <ul style="list-style-type: none"> <li>1 pt developed pancreatitis shortly after <sup>a</sup>RTX treatment (exact timeframe not specified)</li> </ul> | IV                |

| Author Design<br>°n (plus % female pts)<br>Biological intervention | Indication for<br>®RTX/°BMB                                         | Length of follow-up                                                              | Efficacy                                                                                                                                                                                                                                                                                                                                                                                                                                                                                                                                                                                                                                                                                                                                                                                                                                                                                                                                                                                                                                                                                                                                                                                                                                          | Safety                                                                                                                                                                                                                                                                                                                                                                                                                                                                                                                                                                                                                                                                                                                                                                                                                                                                                                                                                                                                                                                                                                                                                                                                                                                                                                   | Level of Evidence |
|--------------------------------------------------------------------|---------------------------------------------------------------------|----------------------------------------------------------------------------------|---------------------------------------------------------------------------------------------------------------------------------------------------------------------------------------------------------------------------------------------------------------------------------------------------------------------------------------------------------------------------------------------------------------------------------------------------------------------------------------------------------------------------------------------------------------------------------------------------------------------------------------------------------------------------------------------------------------------------------------------------------------------------------------------------------------------------------------------------------------------------------------------------------------------------------------------------------------------------------------------------------------------------------------------------------------------------------------------------------------------------------------------------------------------------------------------------------------------------------------------------|----------------------------------------------------------------------------------------------------------------------------------------------------------------------------------------------------------------------------------------------------------------------------------------------------------------------------------------------------------------------------------------------------------------------------------------------------------------------------------------------------------------------------------------------------------------------------------------------------------------------------------------------------------------------------------------------------------------------------------------------------------------------------------------------------------------------------------------------------------------------------------------------------------------------------------------------------------------------------------------------------------------------------------------------------------------------------------------------------------------------------------------------------------------------------------------------------------------------------------------------------------------------------------------------------------|-------------------|
| Dale (2014)<br>°MRC<br>°n = 18 (95% F)<br>®RTX                     | For refractory NPSLE; to prevent relapse and to allow °CS reduction | Median: 1.7 years<br><br>Range: 0.3 – 10 years<br><br>Total of 307 patient-years | <p><i>Clinical response:</i></p> <ul style="list-style-type: none"> <li>Median °mRS score ↓ from 3 to 1 at follow-up (median 1.7 years)</li> <li>Clinician impression determined all but 1 pt as have possible, probable or definite response</li> </ul> <p><i>°CS reduction:</i></p> <ul style="list-style-type: none"> <li>°NR</li> </ul> <p><i>C3 and C4 levels (g/l):</i></p> <ul style="list-style-type: none"> <li>°NR</li> </ul> <p><i>ESR (mm/h):</i></p> <ul style="list-style-type: none"> <li>°NR</li> </ul> <p><i>°Anti-dsDNA levels (IU/l):</i></p> <ul style="list-style-type: none"> <li>°NR</li> </ul> <p><i>Hb levels (g/l) and platelets (x 10<sup>9</sup>/l):</i></p> <ul style="list-style-type: none"> <li>°NR specifically for NPSLE pts</li> </ul> <p><i>Renal outcomes:</i></p> <ul style="list-style-type: none"> <li>°NR</li> </ul> <p><i>B cell depletion:</i></p> <ul style="list-style-type: none"> <li>°NR specifically for NPSLE pts</li> <li><b><u>In the entire cohort</u></b>, B cell depletion (actual values not recorded) was induced in 119/124 pts who had lymphocyte subsets measured</li> </ul> <p><i>Relapses:</i></p> <ul style="list-style-type: none"> <li>°NR specifically for NPSLE pts</li> </ul> | <p><i>Infusion reactions (management NR)</i></p> <ul style="list-style-type: none"> <li>Infusion reactions specific to NSPLE °NR in isolation</li> <li>3 (2%) °grade 4 infusion reactions (anaphylaxis) <b><u>in entire cohort</u></b> (NPSLE pts + other CNS autoimmune disease)</li> <li>15 (10%) °grade ≤3 infusion reactions <b><u>in entire cohort</u></b> (NPSLE pts + other CNS autoimmune disease)</li> </ul> <p><i>Infections</i></p> <ul style="list-style-type: none"> <li>1 °grade 4 infectious complication <b><u>in NPSLE population</u></b> reported occurring at a median of 30 days after RTX initiation: pt developed CMV retinitis</li> <li>7 (5%) °grade 3 infectious complications <b><u>in entire cohort</u></b> (NPSLE pts + other CNS autoimmune disease) requiring hospitalisation/IV antibiotics (unknown if these occurred in NPSLE pts and if so, how many)</li> </ul> <p><i>Ig levels</i></p> <ul style="list-style-type: none"> <li>Out of 124 pts with available data <b><u>in entire cohort</u></b> (NPSLE pts + other CNS autoimmune disease), hypogammaglobulinaemia was reported in 27 pts (22%) however, Ig measurements were not routinely measured before °RTX infusion</li> </ul> <p><i>Withdrawals</i></p> <ul style="list-style-type: none"> <li>°NR</li> </ul> | IV/V              |

| Author Design<br><sup>a</sup> n (plus % female pts)<br>Biological intervention        | Indication for<br><sup>a</sup> RTX/ <sup>b</sup> BMB                                             | Length of follow-up | Efficacy                                                                                                                                                                                                                                                                                                                                                                                                                                                                                                                                                                                                                                                                                                                                                                                                                                                                                                                                                                                                                                                                                                                                                                                                                                                                                                                                                                                                                                                                                                                                                                                                 | Safety                                                                                                                                                                                                                                                                                                                                                                                                                                                                                                                                                                                                                                                                                                                                                                                                                                                                                                                                  | Level of Evidence |
|---------------------------------------------------------------------------------------|--------------------------------------------------------------------------------------------------|---------------------|----------------------------------------------------------------------------------------------------------------------------------------------------------------------------------------------------------------------------------------------------------------------------------------------------------------------------------------------------------------------------------------------------------------------------------------------------------------------------------------------------------------------------------------------------------------------------------------------------------------------------------------------------------------------------------------------------------------------------------------------------------------------------------------------------------------------------------------------------------------------------------------------------------------------------------------------------------------------------------------------------------------------------------------------------------------------------------------------------------------------------------------------------------------------------------------------------------------------------------------------------------------------------------------------------------------------------------------------------------------------------------------------------------------------------------------------------------------------------------------------------------------------------------------------------------------------------------------------------------|-----------------------------------------------------------------------------------------------------------------------------------------------------------------------------------------------------------------------------------------------------------------------------------------------------------------------------------------------------------------------------------------------------------------------------------------------------------------------------------------------------------------------------------------------------------------------------------------------------------------------------------------------------------------------------------------------------------------------------------------------------------------------------------------------------------------------------------------------------------------------------------------------------------------------------------------|-------------------|
| Hui-Yuen (2015)<br><sup>d</sup> PC<br><sup>a</sup> n = 39 (90% F)<br><sup>b</sup> BMB | Inability to taper <sup>i</sup> CS, musculoskeletal manifestations, mucocutaneous manifestations | 6 months            | <p><i>Clinical response:</i></p> <ul style="list-style-type: none"> <li>At 6 months after <sup>b</sup>BMB treatment, 25 pts had <sup>v</sup>clinical improvement</li> </ul> <p><i><sup>i</sup>CS reduction (mg/day):</i></p> <ul style="list-style-type: none"> <li>Mean <sup>i</sup>CS dose ↓ from 17 to 11 by 6 months after <sup>b</sup>BMB initiation</li> <li><sup>i</sup>CS were discontinued in 14 pts by 6 months after <sup>b</sup>BMB initiation (p = 0.002)</li> </ul> <p><i>C3 and C4 levels (g/l):</i></p> <ul style="list-style-type: none"> <li>7 pts had at least 25% improvement in C3 levels (exact values not reported) 3 months after <sup>b</sup>BMB initiation; this was sustained at 6 months (p = 0.0001)</li> <li>C4 levels <sup>i</sup>NR</li> </ul> <p><i>ESR (mm/h):</i></p> <ul style="list-style-type: none"> <li><sup>i</sup>NR</li> </ul> <p><i><sup>m</sup>Anti-dsDNA levels (IU/l):</i></p> <ul style="list-style-type: none"> <li>17 pts had at least 25% decrease in <sup>m</sup>anti-dsDNA levels 3 months after <sup>b</sup>BMB initiation; this was sustained at 6 months (p = 0.0001)</li> </ul> <p><i>Hb levels (g/l) and platelets (x 10<sup>9</sup>/l):</i></p> <ul style="list-style-type: none"> <li><sup>i</sup>NR</li> </ul> <p><i>Renal outcomes:</i></p> <ul style="list-style-type: none"> <li><sup>i</sup>NR</li> </ul> <p><i>B cell depletion:</i></p> <ul style="list-style-type: none"> <li><sup>i</sup>NR</li> </ul> <p><i>Relapses:</i></p> <ul style="list-style-type: none"> <li>3 (8%) flares of LN reported (exact time frame NR)</li> </ul> | <p><i>Infusion reactions (management NR)</i></p> <ul style="list-style-type: none"> <li>3 (2%) reactions reported <b>in entire cohort</b> (adult- and juvenile-onset SLE pts) – exact manifestation <sup>i</sup>NR (exact timeframe not specified)</li> </ul> <p><i>Infections</i></p> <ul style="list-style-type: none"> <li>7 (4%) infectious complications reported <b>in entire cohort</b> (adult- and juvenile-onset SLE pts) – exact severity <sup>i</sup>NR (exact timeframe not specified)</li> </ul> <p><i>Ig levels</i></p> <ul style="list-style-type: none"> <li><sup>i</sup>NR</li> </ul> <p><i>Withdrawals (management NR)</i></p> <ul style="list-style-type: none"> <li>6 (3%) discontinued <sup>b</sup>BMB due to development/worsening of NPSLE <b>in entire cohort</b> (adult- and juvenile-onset SLE pts)</li> <li>6 (3%) discontinued <sup>b</sup>BMB due to a lack of clinical improvement<sup>s</sup></li> </ul> | IV/V              |

| Author<br>Design<br><sup>a</sup> n (plus % female pts)<br>Biological intervention                         | Indication for<br><sup>a</sup> RTX/ <sup>b</sup> BMB                              | Length of<br>follow-up | Efficacy                                                                                                                                                                                                                                                                                                                                                                                                                                                                                                                                                                                                                                                                                                                                                                                                                                                                                                                                                                                                                                                                                                                                                                                                                                                                                                                                                                                                                                                                                                                                                                                                                                                                                                                                                                                                                                                                                                            | Safety                                                                                                                                                                                                                                                                                                                                                                                                                                                                                                                                                                                                                                                          | Level of<br>Evidence |
|-----------------------------------------------------------------------------------------------------------|-----------------------------------------------------------------------------------|------------------------|---------------------------------------------------------------------------------------------------------------------------------------------------------------------------------------------------------------------------------------------------------------------------------------------------------------------------------------------------------------------------------------------------------------------------------------------------------------------------------------------------------------------------------------------------------------------------------------------------------------------------------------------------------------------------------------------------------------------------------------------------------------------------------------------------------------------------------------------------------------------------------------------------------------------------------------------------------------------------------------------------------------------------------------------------------------------------------------------------------------------------------------------------------------------------------------------------------------------------------------------------------------------------------------------------------------------------------------------------------------------------------------------------------------------------------------------------------------------------------------------------------------------------------------------------------------------------------------------------------------------------------------------------------------------------------------------------------------------------------------------------------------------------------------------------------------------------------------------------------------------------------------------------------------------|-----------------------------------------------------------------------------------------------------------------------------------------------------------------------------------------------------------------------------------------------------------------------------------------------------------------------------------------------------------------------------------------------------------------------------------------------------------------------------------------------------------------------------------------------------------------------------------------------------------------------------------------------------------------|----------------------|
| Lehman (2014)<br><sup>f</sup> PS<br><sup>a</sup> n = 12 (75% F)<br><sup>a</sup> RTX plus <sup>i</sup> CYC | Active DPGN or inability<br>to taper <sup>i</sup> CS dosage<br>without SLE flares | 60 months              | <p><i>Clinical response:</i></p> <ul style="list-style-type: none"> <li>Mean <sup>n</sup>SLEDAI ↓ from 10.10 ± 5.9 to 0 by 60 months (p &lt; 0.05)</li> </ul> <p><i><sup>i</sup>CS reduction (mg/day):</i></p> <ul style="list-style-type: none"> <li>Mean <sup>i</sup>CS dose ↓ from 29.7 ± 25 to 7.0 ± 2.5 by 60 months (p &lt; 0.005)</li> </ul> <p><i>C3 and C4 levels (mg/ml):</i></p> <ul style="list-style-type: none"> <li>Mean C3 levels ↑ from 55.5 ± 27 to 107.5 ± 36 by 60 months (p &lt; 0.001)</li> <li>C4 levels <sup>i</sup>NR</li> </ul> <p><i>ESR (mm/h):</i></p> <ul style="list-style-type: none"> <li>Mean ESR ↓ from 42.4 ± 27 to 11.8 ± 12 by 60 months (p &lt; 0.001)</li> </ul> <p><i><sup>m</sup>Anti-dsDNA levels (IU/l):</i></p> <ul style="list-style-type: none"> <li>Unclear results</li> </ul> <p><i>Hb levels (g/dl) and platelets (x 10<sup>9</sup>/l):</i></p> <ul style="list-style-type: none"> <li>Mean Hb level ↑ from 11.3 ± 1.8 to 13.2 ± 1.4 by 60 months (p &lt; 0.05)</li> <li>Platelets <sup>i</sup>NR</li> </ul> <p><i>Renal outcomes:</i></p> <ul style="list-style-type: none"> <li>Mean serum albumin ↑ from 3.37 g/dl to 4.26 g/dl by 60 months (p &lt; 0.025)</li> <li>Mean serum creatinine remained stable throughout (exact values <sup>i</sup>NR)</li> </ul> <p><i>B cell depletion:</i></p> <ul style="list-style-type: none"> <li>CD19 levels returned to normal by 12 months after first RTX course and remained normal at 60 months (exact values <sup>i</sup>NR)</li> </ul> <p><i>Relapses:</i></p> <ul style="list-style-type: none"> <li>1 pt relapsed after 6 years but remission was achieved after another cycle of <sup>a</sup>RTX and <sup>i</sup>CYC</li> <li>1 pt became ANA positive (having become ANA negative) during year 6, she was re-treated with one cycle of <sup>a</sup>RTX and <sup>i</sup>CYC but remains ANA positive</li> </ul> | <p><i>Infusion reactions</i></p> <ul style="list-style-type: none"> <li>None reported</li> </ul> <p><i>Infections</i></p> <ul style="list-style-type: none"> <li>2 pts were hospitalised for febrile neutropaenia – both responded to broad spectrum antibiotics, note that blood, urine and sputum cultures were negative (exact timeframe not specified)</li> </ul> <p><i>Ig levels</i></p> <ul style="list-style-type: none"> <li>Serum Ig levels were transiently decreased but mean values were within normal range for both IgG and IgM at 60 months</li> </ul> <p><i>Withdrawals</i></p> <ul style="list-style-type: none"> <li>None reported</li> </ul> | IV                   |

| Author Design<br><sup>a</sup> n (plus % female pts)<br>Biological intervention      | Indication for<br><sup>a</sup> RTX/ <sup>b</sup> BMB                                                                                             | Length of follow-up                        | Efficacy                                                                                                                                                                                                                                                                                                                                                                                                                                                                                                                                                                                                                                                                                                                                                                                                                                                                                                                                                                                                                                                                                                                                                                                                                                                                                                                                                                                                                                                                                                                                                                                                                                                                                                                                                                                                                                                                                                                                                                                                                                                                                                                                                                                                                                                                                                                                                                                                                                                                                                                                                                                                                                                                                                                                                                                                                                                                      | Safety                                                                                                                                                                                                                                                                                                                                                                                                                                                                                                                                                                                                                                                                                                                                                                                                                                                                                                                                                                                                                                                                                                                                                                                                                                                                                                                                                                                                          | Level of Evidence |
|-------------------------------------------------------------------------------------|--------------------------------------------------------------------------------------------------------------------------------------------------|--------------------------------------------|-------------------------------------------------------------------------------------------------------------------------------------------------------------------------------------------------------------------------------------------------------------------------------------------------------------------------------------------------------------------------------------------------------------------------------------------------------------------------------------------------------------------------------------------------------------------------------------------------------------------------------------------------------------------------------------------------------------------------------------------------------------------------------------------------------------------------------------------------------------------------------------------------------------------------------------------------------------------------------------------------------------------------------------------------------------------------------------------------------------------------------------------------------------------------------------------------------------------------------------------------------------------------------------------------------------------------------------------------------------------------------------------------------------------------------------------------------------------------------------------------------------------------------------------------------------------------------------------------------------------------------------------------------------------------------------------------------------------------------------------------------------------------------------------------------------------------------------------------------------------------------------------------------------------------------------------------------------------------------------------------------------------------------------------------------------------------------------------------------------------------------------------------------------------------------------------------------------------------------------------------------------------------------------------------------------------------------------------------------------------------------------------------------------------------------------------------------------------------------------------------------------------------------------------------------------------------------------------------------------------------------------------------------------------------------------------------------------------------------------------------------------------------------------------------------------------------------------------------------------------------------|-----------------------------------------------------------------------------------------------------------------------------------------------------------------------------------------------------------------------------------------------------------------------------------------------------------------------------------------------------------------------------------------------------------------------------------------------------------------------------------------------------------------------------------------------------------------------------------------------------------------------------------------------------------------------------------------------------------------------------------------------------------------------------------------------------------------------------------------------------------------------------------------------------------------------------------------------------------------------------------------------------------------------------------------------------------------------------------------------------------------------------------------------------------------------------------------------------------------------------------------------------------------------------------------------------------------------------------------------------------------------------------------------------------------|-------------------|
| Olfat (2015)<br><sup>b</sup> SRC<br><sup>a</sup> n = 24 (75% F)<br><sup>a</sup> RTX | Refractory AITP and/or AIHA defined by an inadequate response to conventional therapies ( <sup>c</sup> CS, IVIG and/or other immunosuppressants) | Median: 29 months<br><br>IQR: 15-59 months | <p><i>Clinical response:</i></p> <ul style="list-style-type: none"> <li>96% pts had <sup>k+</sup>xCR following first course at median of 48 (IQR 14 – 103) days</li> <li>In pts with AITP, there was no significant difference in time to <sup>k+</sup>xCR between patients receiving or not receiving <sup>c</sup>CS (median time to reach <sup>k+</sup>xCR of 19 days)</li> <li>In pts with AIHA, all pts were receiving concomitant CS to reach <sup>k+</sup>xCR (median time to reach <sup>k+</sup>xCR of 85 days)</li> <li>Median duration of <sup>k+</sup>xCR was 25 (IQR 16 – 49) months</li> <li>Treatment failure occurred in 1 pt (4%)</li> </ul> <p><i><sup>c</sup>CS reduction (mg/day):</i></p> <ul style="list-style-type: none"> <li>17 pts receiving <sup>c</sup>CS, dose ↓ from median of 50 (IQR 20 – 60) to 0 (IQR 0 – 7.5) at 12 months</li> </ul> <p><i>C3 and C4 levels (g/l):</i></p> <ul style="list-style-type: none"> <li><sup>c</sup>NR</li> </ul> <p><i>ESR (mm/h):</i></p> <ul style="list-style-type: none"> <li><sup>c</sup>NR</li> </ul> <p><i><sup>m</sup>Anti-dsDNA levels (IU/l):</i></p> <ul style="list-style-type: none"> <li><sup>c</sup>NR</li> </ul> <p><i>Hb levels (g/l) and platelets (x 10<sup>9</sup>/l):</i></p> <ul style="list-style-type: none"> <li>Median Hb in AIHA pts ↑ from 28 (IQR 8 – 39) to 206 (IQR 136 – 278) at last follow-up (median 29 months)</li> <li>Median platelets in AITP pts ↑ from 75 (IQR 67 – 93) to 126 (IQR 114 – 132) at last follow-up (median 29 months)</li> </ul> <p><i>Renal outcomes:</i></p> <ul style="list-style-type: none"> <li><sup>c</sup>NR</li> </ul> <p><i>B cell depletion:</i></p> <ul style="list-style-type: none"> <li>18 pts had B cell immunophenotyping with B cell depletion (defined as &lt;1% CD20 cells on immunophenotyping) achieved at median time of 16 (IQR 14 – 30) days</li> <li>4 pts had B cell immunophenotyping measured at 3 months and all pts demonstrated B cell depletion</li> <li>B cell reconstitution was not measured consistently at set intervals, however, reconstitution (a rise in CD20 %) occurred at median time of 331 (IQR 175 – 468) days</li> <li>For pts who flared and had B cells measured, there was no significant correlation between the time to flare and the time to B cell reconstitution (exact data <sup>c</sup>NR)</li> </ul> <p><i>Relapses:</i></p> <ul style="list-style-type: none"> <li>Median duration of response for all courses was 25 (IQR 16 – 49) months</li> <li>5 pts experienced total of 12 <sup>y</sup>flare episodes at a median of 22 (IQR 15 – 27) months</li> <li><sup>k+</sup>xCR was achieved following each course of RTX administered for a <sup>y</sup>flare</li> <li>Survival analysis indicates that the probability of flare at up to 8 years post-<sup>k+</sup>xCR is &lt;40%</li> </ul> | <p><i>Infusion reactions (management <sup>c</sup>NR)</i></p> <ul style="list-style-type: none"> <li>2 infusion reactions reported (1 pt (4%) developed fever, urticaria and hypotension; 1 pt (4%) developed mild pruritus)</li> </ul> <p><i>Infections</i></p> <ul style="list-style-type: none"> <li>1 pt developed Herpes Zoster 7 weeks after first dose of <sup>a</sup>RTX (requiring hospitalisation and anti-virals) – note pt had hypogammaglobulinaemia that preceded <sup>a</sup>RTX therapy</li> <li>1 pt developed recurrent sinopulmonary infections 5 years after 2<sup>nd</sup> course of <sup>a</sup>RTX – IVIG replacement was administered</li> </ul> <p><i>Ig levels</i></p> <ul style="list-style-type: none"> <li>In 20 pts with normal/elevated IgG at initiation, 4 (17%) developed transient hypogammaglobulinaemia (lasting up to 6 months) – of whom 1 pt developed persistent hypogammaglobulinaemia and required monthly IVIG replacement 5 years after 2<sup>nd</sup> <sup>a</sup>RTX course</li> <li>IgG levels at <sup>a</sup>RTX initiation were low in 4 pts (17%)</li> <li>3 out of 4 pts who had hypogammaglobulinaemia before <sup>a</sup>RTX initiation developed persistent hypogammaglobulinaemia, 2 of whom required monthly IVIG (exact timeframe <sup>c</sup>NR)</li> </ul> <p><i>Withdrawals</i></p> <ul style="list-style-type: none"> <li>None reported</li> </ul> | IV                |

| Author Design<br>°n (plus % female pts)<br>Biological intervention | Indication for<br>®RTX/°BMB                                                           | Length of follow-up                              | Efficacy                                                                                                                                                                                                                                                                                                                                                                                                                                                                                                                                                                                                                                                                                                                                                                                                                                                                                                                                                                                                                                                                                                                                                                                                                                                                                                                                                                                                                                                                                                                                                                                                                                                                                                                                                                                                                                                                                                                                                                                                                                                                                                                                                                                                                                                                                                                                                                                                                                                                                                                                                                                                                                                                                                                                                                                                                                                                                                                          | Safety                                                                                                                                                                                                                                                                                                                                                                                                                                                                                                                                                                                                                                                                                                                                                                                                                                                                                                                                                 | Level of Evidence |
|--------------------------------------------------------------------|---------------------------------------------------------------------------------------|--------------------------------------------------|-----------------------------------------------------------------------------------------------------------------------------------------------------------------------------------------------------------------------------------------------------------------------------------------------------------------------------------------------------------------------------------------------------------------------------------------------------------------------------------------------------------------------------------------------------------------------------------------------------------------------------------------------------------------------------------------------------------------------------------------------------------------------------------------------------------------------------------------------------------------------------------------------------------------------------------------------------------------------------------------------------------------------------------------------------------------------------------------------------------------------------------------------------------------------------------------------------------------------------------------------------------------------------------------------------------------------------------------------------------------------------------------------------------------------------------------------------------------------------------------------------------------------------------------------------------------------------------------------------------------------------------------------------------------------------------------------------------------------------------------------------------------------------------------------------------------------------------------------------------------------------------------------------------------------------------------------------------------------------------------------------------------------------------------------------------------------------------------------------------------------------------------------------------------------------------------------------------------------------------------------------------------------------------------------------------------------------------------------------------------------------------------------------------------------------------------------------------------------------------------------------------------------------------------------------------------------------------------------------------------------------------------------------------------------------------------------------------------------------------------------------------------------------------------------------------------------------------------------------------------------------------------------------------------------------------|--------------------------------------------------------------------------------------------------------------------------------------------------------------------------------------------------------------------------------------------------------------------------------------------------------------------------------------------------------------------------------------------------------------------------------------------------------------------------------------------------------------------------------------------------------------------------------------------------------------------------------------------------------------------------------------------------------------------------------------------------------------------------------------------------------------------------------------------------------------------------------------------------------------------------------------------------------|-------------------|
| Reis (2016)<br>°CS<br>°n = 4 (100% F)<br>®RTX                      | 3 pts had refractory class IV LN and 1 pt had refractory multisystem involvement JSLE | Median: 21.5 months<br><br>Range: 12 – 70 months | <p><i>Clinical response:</i></p> <ul style="list-style-type: none"> <li>°SLEDAI scores ↓ from median of 15.5 (range 11 – 18) to 3 (0 – 6) at last evaluation (median of 21.5 months)</li> </ul> <p><i>°CS reduction (mg/day):</i></p> <ul style="list-style-type: none"> <li>Median °CS dose ↓ from 22.5 (range 20 – 25) to 13.75 (range 10 – 20) at the last evaluation (median of 21.5 months) with a median decrease of 7.5 (range 5 – 15) mg/day</li> </ul> <p><i>C3 and C4 levels (g/l):</i></p> <ul style="list-style-type: none"> <li>From 3 pts with data available at 12 month follow-up, median C3 ↑ from 91 (range 74 – 98) to 117 (range 109 – 132)</li> <li>From 3 pts with data available at 12 month follow-up, median C4 ↑ from 17 (range 15 – 19) to 27 (range 19 – 44)</li> <li>C3 and C4 levels in remaining pt at 8 months (not available at 15 months) increased from 100 to 137, and 18 to 31, respectively</li> </ul> <p><i>ESR (mm/h):</i></p> <ul style="list-style-type: none"> <li>From 3 pts with data available at 12 month follow-up, median ESR ↓ from 93 (range 46 – 103) to 36 (range 24 – 46)</li> <li>In remaining pt (follow up at 15 months) ESR ↓ from 71 to 29</li> </ul> <p><i>°Anti-dsDNA levels (IU/l):</i></p> <ul style="list-style-type: none"> <li>1 pt's °anti-dsDNA titre did not respond to ®RTX (level remained &gt;800)</li> <li>Remaining 2 pts with data available at 12 months, median °anti-dsDNA ↓ from 131.4 (range 25.8 – 237) to 98.7 (range 18.9 – 178.4)</li> <li>Anti-dsDNA in remaining pt at 8 months (not available at 15 months) ↓ from 190.4 to 84.2</li> </ul> <p><i>Hb levels (g/l) and platelets (x 10<sup>9</sup>/l):</i></p> <ul style="list-style-type: none"> <li>From 3 pts with data available at 12 month follow-up, median Hb ↑ from 8.9 (range 6.1 – 12.3) to 12.4 (range 11.2 – 13.7)</li> <li>In remaining pt (follow up at 15 months) Hb ↑ from 10.5 to 11.4</li> <li>From 3 pts with data available at 12 month follow-up, median platelets ↑ from 297 (range 64 – 313) to 318 (range 305 – 348)</li> <li>In remaining pt (followed up at 15 months) platelets ↑ from 71 to 296</li> </ul> <p><i>Renal outcomes:</i></p> <ul style="list-style-type: none"> <li>From 3 pts with data available at 12 month follow-up, median creatinine ↓ from 0.72 (range 0.42 - 1.13) to 0.77 (range 0.54 – 0.91)</li> <li>°UACR was not consistently reported</li> </ul> <p><i>B cell depletion:</i></p> <ul style="list-style-type: none"> <li>Insufficient data available; however 1 pt required 4 cycles of ®RTX due to worsening polyarthritis which was always preceded by an increase in CD19+ B cell count</li> </ul> <p><i>Relapses:</i></p> <ul style="list-style-type: none"> <li>2 pts had 'moderate' flares during follow-up (°SLEDAI ↑ by &gt;3 points) which required adjustment of conventional therapy and repeat cycles of ®RTX</li> </ul> | <p><i>Infusion reactions</i></p> <ul style="list-style-type: none"> <li>In 23 infusions, no infusion reactions were reported</li> </ul> <p><i>Infections</i></p> <ul style="list-style-type: none"> <li>1 °LRTI 3 months after °RTX infusion; treated successfully with antibiotics (no hospitalisation reported)</li> <li>1 Cryptococcus infection 1 month after °RTX infusion; treated successfully with antifungals (no hospitalisation explicitly reported but implied in the comment ("50 days later... After discharge"))</li> </ul> <p><i>Ig levels</i></p> <ul style="list-style-type: none"> <li>1 pt had hypogammaglobulinaemia (IgG 423 mg/dl) and was treated with IVIG (pre-°RTX levels NR)</li> <li>1 pt treated with IVIG 1 week after RTX infusion (pre-°RTX levels °NR and this is not directly attributed to RTX in the original report)</li> </ul> <p><i>Withdrawals</i></p> <ul style="list-style-type: none"> <li>None</li> </ul> | IV/V              |

| Author Design<br><sup>a</sup> n (plus % female pts)<br>Biological intervention                                           | Indication for<br><sup>a</sup> RTX/ <sup>b</sup> BMB                                                                                           | Length of<br>follow-up                                                   | Efficacy                                                                                                                                                                                                                                                                                                                                                                                                                                                                                                                                                                                                                                                                                                                                                                                                                                                                                                                                                                                                                                                                                                                                                                                                                                                                                                                                                                                                                                                                                                                                                                                                                                                                                                                                                                                                                                                                                                                                                                                                                                                                                                                                                                                                                                                                                                                                                                                                                                                                                                                                  | Safety                                                                                                                                                                                                                                                                                                                                                                                                                                                                                                                                                                                                                                                                                                                                                                                                                                                                                                                                                                                                                                                                                                                                                                          | Level of<br>Evidence |
|--------------------------------------------------------------------------------------------------------------------------|------------------------------------------------------------------------------------------------------------------------------------------------|--------------------------------------------------------------------------|-------------------------------------------------------------------------------------------------------------------------------------------------------------------------------------------------------------------------------------------------------------------------------------------------------------------------------------------------------------------------------------------------------------------------------------------------------------------------------------------------------------------------------------------------------------------------------------------------------------------------------------------------------------------------------------------------------------------------------------------------------------------------------------------------------------------------------------------------------------------------------------------------------------------------------------------------------------------------------------------------------------------------------------------------------------------------------------------------------------------------------------------------------------------------------------------------------------------------------------------------------------------------------------------------------------------------------------------------------------------------------------------------------------------------------------------------------------------------------------------------------------------------------------------------------------------------------------------------------------------------------------------------------------------------------------------------------------------------------------------------------------------------------------------------------------------------------------------------------------------------------------------------------------------------------------------------------------------------------------------------------------------------------------------------------------------------------------------------------------------------------------------------------------------------------------------------------------------------------------------------------------------------------------------------------------------------------------------------------------------------------------------------------------------------------------------------------------------------------------------------------------------------------------------|---------------------------------------------------------------------------------------------------------------------------------------------------------------------------------------------------------------------------------------------------------------------------------------------------------------------------------------------------------------------------------------------------------------------------------------------------------------------------------------------------------------------------------------------------------------------------------------------------------------------------------------------------------------------------------------------------------------------------------------------------------------------------------------------------------------------------------------------------------------------------------------------------------------------------------------------------------------------------------------------------------------------------------------------------------------------------------------------------------------------------------------------------------------------------------|----------------------|
| Tambralli (2015)<br><sup>b</sup> SRG<br><sup>a</sup> n = 50 JSLE pts (82% F) out<br>of 104 pt cohort<br><sup>a</sup> RTX | 20 pts received RTX as<br>part of their initial<br>therapy<br><br>30 pts had refractory<br>disease to 1 or more<br>immunosuppressive<br>agents | Mean: 2.6<br>years ± 1.5<br>years (SD)<br><br>132.2<br>patient-<br>years | <p><i>Clinical response: results available for 41 pts</i></p> <ul style="list-style-type: none"> <li><sup>a</sup>PGA ↓ from 35.2 ± 19.2 to 14.3 ± 12.1 at 12 months (p &lt; 0.001)</li> </ul> <p><i><sup>l</sup>CS reduction (mg): results available for 48 pts</i></p> <ul style="list-style-type: none"> <li>Median <sup>l</sup>CS dose ↓ from 31.7 ± 23.4 to 8.8 ± 12.1 at 12 months (p &lt; 0.001)</li> </ul> <p><i>C3 and C4 levels (mg/dl): results available for 29 pts</i></p> <ul style="list-style-type: none"> <li>Median C3 levels ↑ from 70.4 ± 39.8 to 115 ± 41.8 at 12 months (p &lt; 0.001)</li> <li>Median C4 levels ↑ from 11.6 ± 11.5 to 25.6 ± 15.9 at 12 months (p &lt; 0.001)</li> </ul> <p><i>ESR (mm/h): results available for 47 pts</i></p> <ul style="list-style-type: none"> <li>Median ESR ↓ from 57.4 ± 37.7 to 37.2 ± 28.4 at 12 months (p = 0.005)</li> </ul> <p><i><sup>m</sup>Anti-dsDNA levels (IU/l): results available for 37 pts</i></p> <ul style="list-style-type: none"> <li>Median <sup>m</sup>anti-dsDNA ↓ from 860 ± 3300 to 85 ± 301 at 12 months (p value not statistically significant)</li> </ul> <p><i>Hb levels (g/l) and platelets (x 10<sup>9</sup>/l): results available for 48 pts</i></p> <ul style="list-style-type: none"> <li>Median Hb ↑ from 10.9 ± 1.6 to 12.0 ± 1.4 at 12 months (p &lt; 0.001)</li> <li>Platelets <sup>l</sup>NR</li> </ul> <p><i>Renal outcomes: results available for 48 pts</i></p> <ul style="list-style-type: none"> <li>Median creatinine (mmol/l) ↓ from 1.0 ± 2.0 to 0.84 ± 1.1 at 12 months (p value not statistically significant)</li> <li>Median albumin (g/l) ↑ from 3.7 ± 0.76 to 4.2 ± 0.51 at 12 months (p &lt; 0.001)</li> <li>Median <sup>s</sup>UACR (available for 40 pts only) ↓ from 0.96 ± 2.0 to 0.75 ± 1.8 (p value not statistically significant)</li> </ul> <p><i>B cell depletion: results available for 78 pts (pre-RTX) and 100 pts (post-RTX)</i></p> <ul style="list-style-type: none"> <li>Partial depletion in all cases: CD19 counts decreased from 422 to 2.9 cells/μl (p &lt; 0.0001) <b>in entire cohort</b> (JSLE pts and other rheumatic diseases)</li> <li>82/104 pts achieved B cell counts &lt;5 cells/μl <b>in entire cohort</b> (JSLE pts and other rheumatic diseases)</li> <li>Highest post-<sup>a</sup>RTX B cell count of 37 cells/μl <b>in entire cohort</b> (JSLE pts and other rheumatic diseases)</li> </ul> <p><i>Relapses:</i></p> <ul style="list-style-type: none"> <li><sup>l</sup>NR</li> </ul> | <p><i>Infusion reactions</i></p> <ul style="list-style-type: none"> <li>26 (5.6% of infusions) reactions occurred <b>in entire cohort</b> (JSLE pts and other rheumatic diseases) – none required IM adrenaline or urgent admission</li> </ul> <p><i>Infections</i></p> <ul style="list-style-type: none"> <li>12 infections occurred requiring hospitalisation out of 132.2 patient-years (rate of 90.8/100 000)</li> </ul> <p><i>Ig levels</i></p> <ul style="list-style-type: none"> <li>IVIG administered to 13 pts who developed hypogammaglobulinaemia; median IgG level was 386 (range 160 – 798) mg/dl <b>in entire cohort</b> (JSLE pts and other rheumatic diseases) – note 2 pts developed hypogammaglobulinaemia within weeks of RTX therapy, remaining 11 pts developed hypogammaglobulinaemia months or years after <sup>a</sup>RTX initiation (mean 8 months)</li> <li>Baseline IgG levels available in 7/13 pts requiring IVIG, of whom 3 had low levels before <sup>a</sup>RTX initiation <b>in entire cohort</b> (JSLE pts and other rheumatic diseases)</li> </ul> <p><i>Withdrawals</i></p> <ul style="list-style-type: none"> <li>None reported</li> </ul> | IV                   |

| Author Design<br><sup>a</sup> n (plus % female pts)<br>Biological intervention      | Indication for<br><sup>®</sup> RTX/ <sup>h</sup> BMB      | Length of follow-up                           | Efficacy                                                                                                                                                                                                                                                                                                                                                                                                                                                                                                                                                                                                                                                                                                                                                                                                                                                                                                                                                                                                                                                                                                                                                                                                                                                                                                                                                                                                                                                                                                                                                                                                                                                                                                                                                                                                                                                                                                                                                                                                                                                                                                                                                                                                                                        | Safety                                                                                                                                                                                                                                                                                                                                                                                                                                                                                                                                                                                                                                                                                         | Level of Evidence |
|-------------------------------------------------------------------------------------|-----------------------------------------------------------|-----------------------------------------------|-------------------------------------------------------------------------------------------------------------------------------------------------------------------------------------------------------------------------------------------------------------------------------------------------------------------------------------------------------------------------------------------------------------------------------------------------------------------------------------------------------------------------------------------------------------------------------------------------------------------------------------------------------------------------------------------------------------------------------------------------------------------------------------------------------------------------------------------------------------------------------------------------------------------------------------------------------------------------------------------------------------------------------------------------------------------------------------------------------------------------------------------------------------------------------------------------------------------------------------------------------------------------------------------------------------------------------------------------------------------------------------------------------------------------------------------------------------------------------------------------------------------------------------------------------------------------------------------------------------------------------------------------------------------------------------------------------------------------------------------------------------------------------------------------------------------------------------------------------------------------------------------------------------------------------------------------------------------------------------------------------------------------------------------------------------------------------------------------------------------------------------------------------------------------------------------------------------------------------------------------|------------------------------------------------------------------------------------------------------------------------------------------------------------------------------------------------------------------------------------------------------------------------------------------------------------------------------------------------------------------------------------------------------------------------------------------------------------------------------------------------------------------------------------------------------------------------------------------------------------------------------------------------------------------------------------------------|-------------------|
| Trachana (2013)<br><sup>°</sup> CS<br><sup>a</sup> n = 4 (0% F)<br><sup>®</sup> RTX | LN refractory to conventional immunosuppressive treatment | Median: 16 months<br><br>Range: 6 – 21 months | <p><i>Clinical response:</i></p> <ul style="list-style-type: none"> <li>Median <sup>°</sup>ECLAM scores ↓ from 6.5 (range 4 – 7) to 1.5 (range 0 – 4) at last follow-up (median 16 months; range 6 – 21 months)</li> </ul> <p><i><sup>i</sup>CS reduction (mg/day):</i></p> <ul style="list-style-type: none"> <li>Median <sup>i</sup>CS dose ↓ from 25 (range 20 – 40) to 6 (range 2.5 – 10) with remission maintained in 3 pts</li> </ul> <p><i>C3 and C4 levels (g/l):</i></p> <ul style="list-style-type: none"> <li>Median C3 level ↑ from 0.633 (range 0.479 – 0.865) to 1.019 (range 0.826 – 1.56) at last follow-up</li> <li>Median C4 ↑ from 0.06 (range 0.017 – 0.129) to 0.125 (range 0.069 – 0.199) at last follow-up</li> </ul> <p><i>ESR (mm/h):</i></p> <ul style="list-style-type: none"> <li><sup>i</sup>NR</li> </ul> <p><i><sup>m</sup>Anti-dsDNA levels (IU/l):</i></p> <ul style="list-style-type: none"> <li>Levels were low at <sup>®</sup>RTX initiation (exact data not reported)</li> </ul> <p><i>Hb levels (g/l and platelets (x 10<sup>9</sup>/l)):</i></p> <ul style="list-style-type: none"> <li><sup>i</sup>NR</li> </ul> <p><i>Renal outcomes:</i></p> <ul style="list-style-type: none"> <li><sup>°</sup>Complete renal remission achieved in all pts within median interval of 3.5 (range 2-4) months</li> <li>24h urinary protein excretion ↓ from 4,450 (range 1,000 – 8,155) mg/day to 427 (range 304 – 489) mg/day within median interval of 3.5 (range 2-4) months</li> <li>3 patients retained remission during follow-up (median 16 months; range (6 – 21 months)</li> <li>1 pt was hypoalbuminaemic at <sup>®</sup>RTX initiation which normalised after 4<sup>th</sup> <sup>®</sup>RTX infusion (exact levels not reported)</li> </ul> <p><i>B cell depletion:</i></p> <ul style="list-style-type: none"> <li>B cell depletion was achieved by all pts by 2-4 weeks after initial RTX dose (exact data <sup>i</sup>NR)</li> </ul> <p><i>Relapses:</i></p> <ul style="list-style-type: none"> <li>1 pt relapsed at 7 months, possibly to severe psychological stress (he was retreated with <sup>®</sup>RTX and responded partially with a 50% reduction of 24h urinary protein excretion)</li> </ul> | <p><i>Infusion reactions</i></p> <ul style="list-style-type: none"> <li>No serious infusion reactions reported (no qualification of ‘serious’)</li> </ul> <p><i>Infections</i></p> <ul style="list-style-type: none"> <li>No serious infections reported (no qualification of ‘serious’)</li> </ul> <p><i>Ig levels</i></p> <ul style="list-style-type: none"> <li>Marked decrease in IgM levels before and after <sup>®</sup>RTX infusion (from 0.563 g/l to 0.296 g/l) but there is no indication that IVIG was needed</li> <li>No significant differences in IgG levels were observed</li> </ul> <p><i>Withdrawals</i></p> <ul style="list-style-type: none"> <li><sup>i</sup>NR</li> </ul> | IV                |



| Author Design<br><sup>a</sup> n (plus % female pts)<br>Biological intervention                                         | Indication for<br><sup>a</sup> RTX/ <sup>b</sup> BMB                        | Length of<br>follow-up                        | Efficacy                                                                                                                                                                                                                                                                                                                                                                                                                                                                                                                                                                                                                                                                                                                                                                                                                                                                                                                                                                                                                                                                                                                                                                                                                                                                                                                                                                                                                                                                                                                                                                                                                                                                                                                                                                                                                                                                                                                                                                                                                                                                                                                                                                                                                                                                                                                                                                                                                                                                                                                                                                                                                                                                                                                                                                                                                                                                                                                                                             | Safety                                                                                                                                                                                                                                                                                                                                                                                                                                                                                                                                                                                                                                                                                                                                                                                                                                                                                                                                                                                                                                                                                                          | Level of<br>Evidence |
|------------------------------------------------------------------------------------------------------------------------|-----------------------------------------------------------------------------|-----------------------------------------------|----------------------------------------------------------------------------------------------------------------------------------------------------------------------------------------------------------------------------------------------------------------------------------------------------------------------------------------------------------------------------------------------------------------------------------------------------------------------------------------------------------------------------------------------------------------------------------------------------------------------------------------------------------------------------------------------------------------------------------------------------------------------------------------------------------------------------------------------------------------------------------------------------------------------------------------------------------------------------------------------------------------------------------------------------------------------------------------------------------------------------------------------------------------------------------------------------------------------------------------------------------------------------------------------------------------------------------------------------------------------------------------------------------------------------------------------------------------------------------------------------------------------------------------------------------------------------------------------------------------------------------------------------------------------------------------------------------------------------------------------------------------------------------------------------------------------------------------------------------------------------------------------------------------------------------------------------------------------------------------------------------------------------------------------------------------------------------------------------------------------------------------------------------------------------------------------------------------------------------------------------------------------------------------------------------------------------------------------------------------------------------------------------------------------------------------------------------------------------------------------------------------------------------------------------------------------------------------------------------------------------------------------------------------------------------------------------------------------------------------------------------------------------------------------------------------------------------------------------------------------------------------------------------------------------------------------------------------------|-----------------------------------------------------------------------------------------------------------------------------------------------------------------------------------------------------------------------------------------------------------------------------------------------------------------------------------------------------------------------------------------------------------------------------------------------------------------------------------------------------------------------------------------------------------------------------------------------------------------------------------------------------------------------------------------------------------------------------------------------------------------------------------------------------------------------------------------------------------------------------------------------------------------------------------------------------------------------------------------------------------------------------------------------------------------------------------------------------------------|----------------------|
| Watson (2015)<br><sup>c</sup> MRC<br><sup>a</sup> n = 63 (79% F)<br><sup>a</sup> RTX (plus <sup>c</sup> CYC in 46 pts) | Refractory LN was the most common indication (followed by general symptoms) | Median: 2.5 months<br><br>IQR: 1.6-4.3 months | <p><i>Clinical response: available for 46 courses of RTX in 25 pts</i></p> <ul style="list-style-type: none"> <li>Global <sup>a</sup>BILAG score ↓ from 4.5 (range 0 – 28) to 3.0 (range 0 – 15) at 2.5 (IQR 1.6 – 4.3) months after treatment (p = 0.16 and not statistically significant)</li> </ul> <p><i><sup>i</sup>CS reduction (mg/kg): available for all 104 <sup>a</sup>RTX cycles</i></p> <ul style="list-style-type: none"> <li>Median <sup>i</sup>CS dose ↓ from 0.24 (IQR 0.09 – 0.40) to 0.19 (IQR 0.09 – 0.32) at 2.5 (IQR 1.6 – 4.3) months after treatment (p = 0.01)</li> </ul> <p><i>C3 and C4 levels (g/l): available for all 104 <sup>a</sup>RTX cycles</i></p> <ul style="list-style-type: none"> <li>Median C3 ↑ from 0.7 (IQR 0.54 – 0.99) to 0.89 (IQR 0.67 – 1.10) at 2.5 (IQR 1.6 – 4.3) months after treatment (p &lt; 0.001)</li> <li>Median C4 ↑ from 0.09 (IQR 0.06 – 0.23) to 0.15 (IQR 0.07 – 0.23) at 2.5 (IQR 1.6 – 4.3) months after treatment (p = 0.001)</li> </ul> <p><i>ESR (mm/h): available for all 104 <sup>a</sup>RTX cycles</i></p> <ul style="list-style-type: none"> <li>Median ESR ↓ from 58 (IQR 23 – 91) to 40 (IQR 14 – 70) at 2.5 (IQR 1.6 – 4.3) months after treatment (p &lt; 0.001)</li> </ul> <p><i><sup>m</sup>Anti-dsDNA levels (IU/l): available for all 104 <sup>a</sup>RTX cycles</i></p> <ul style="list-style-type: none"> <li>Median <sup>m</sup>anti-dsDNA ↓ from 61 (IQR 7 – 178) to 28 (IQR 5 – 73) at 2.5 (IQR 1.6 – 4.3) months after treatment (p &lt; 0.001)</li> </ul> <p><i>Hb levels (g/l) and platelets (x 10<sup>9</sup>/l): available for all 104 <sup>a</sup>RTX cycles</i></p> <ul style="list-style-type: none"> <li>Median Hb ↑ from 10.8 (IQR 9.7 – 12.3) to 11.7 (IQR 9.9 – 12.9) at 2.5 (IQR 1.6 – 4.3) months after treatment (p = 0.002)</li> <li>Median platelets ↑ from 242 (IQR 157 – 334) to 274 (IQR 219 – 343) at 2.5 (IQR 1.6 – 4.3) months after treatment (p value was not statistically significant)</li> </ul> <p><i>Renal outcomes: available for all 104 <sup>a</sup>RTX cycles</i></p> <ul style="list-style-type: none"> <li>Median creatinine (mmol/l) ↓ from 58 (IQR 45 – 71) to 55 (IQR 45 – 68) at 2.5 (IQR 1.6 – 4.3) months after treatment (p &lt; 0.001)</li> <li>Median albumin (g/l) ↑ from 37 (IQR 28 – 42) to 40 (IQR 32 – 42) at 2.5 (IQR 1.6 – 4.3) months after treatment (p = 0.026)</li> <li>Median <sup>s</sup>UACR (in pts with level &gt; 30 mg/mmol at baseline) ↓ from 229 (IQR 112 – 575) to 140 (48 – 485) at 2.5 (IQR 1.6 – 4.3) months after treatment (p = 0.04)</li> </ul> <p><i>B cell depletion:</i></p> <ul style="list-style-type: none"> <li>1% had poor B cell depletion; however, B cell numbers were not routinely measured</li> </ul> <p><i>Relapses:</i></p> <ul style="list-style-type: none"> <li>NR; however, 19 pts (30%) received &gt;1 course of <sup>a</sup>RTX accounting for 60/104 courses in total</li> </ul> | <p><i>Infusion reactions</i></p> <ul style="list-style-type: none"> <li>6% courses (total of 104) associated with an infusion reaction – 2% were anaphylactic; 4% were mild/moderate</li> </ul> <p><i>Infections (requiring acute hospital admission or documented in clinical notes)</i></p> <ul style="list-style-type: none"> <li>2% courses (total of 104) developed infection within 3 months of treatment (1 pt with CMV and adenovirus; 1 pt with herpes zoster)</li> </ul> <p><i>Ig levels</i></p> <ul style="list-style-type: none"> <li>Post-<sup>a</sup>RTX levels of IgG, IgA and IgM were all statistically significantly reduced</li> <li>2% course (total of 104) developed Ig levels that required IVIG replacement</li> </ul> <p><i>Withdrawals</i></p> <ul style="list-style-type: none"> <li>In 8% courses (total of 104), the second dose (i.e. on day 14) was delayed due to neutropaenia, fever, surgery for oesophageal stricture, drug unavailable, no hospital bed available, URTI</li> </ul> <p><i>Overall – AEs were reported in 18% <sup>a</sup>RTX courses (19 out of 104)</i></p> | IV                   |

| Author Design<br><sup>a</sup> n (plus % female pts)<br>Biological intervention                                                                                                                                                                                                                                                                                                                                                                                                                                                                                                                                                                                                                                                                                                                                                                                                                                                                                                                                                                                                                                                                                                                                                                                                                                                                                                                                                                                                                                                                                                                                                                                                                                                                                                                                                                                                                                                                                                                                                                                                                                                                          | Indication for<br><sup>a</sup> RTX/ <sup>b</sup> BMB | Length of follow-up | Efficacy | Safety | Level of Evidence |
|---------------------------------------------------------------------------------------------------------------------------------------------------------------------------------------------------------------------------------------------------------------------------------------------------------------------------------------------------------------------------------------------------------------------------------------------------------------------------------------------------------------------------------------------------------------------------------------------------------------------------------------------------------------------------------------------------------------------------------------------------------------------------------------------------------------------------------------------------------------------------------------------------------------------------------------------------------------------------------------------------------------------------------------------------------------------------------------------------------------------------------------------------------------------------------------------------------------------------------------------------------------------------------------------------------------------------------------------------------------------------------------------------------------------------------------------------------------------------------------------------------------------------------------------------------------------------------------------------------------------------------------------------------------------------------------------------------------------------------------------------------------------------------------------------------------------------------------------------------------------------------------------------------------------------------------------------------------------------------------------------------------------------------------------------------------------------------------------------------------------------------------------------------|------------------------------------------------------|---------------------|----------|--------|-------------------|
| <sup>a</sup> n: number of JSLE participants; <sup>b</sup> SRC: single-centre retrospective cohort; <sup>c</sup> MRC: multi-centre retrospective cohort; <sup>d</sup> PC: prospective cohort; <sup>e</sup> CS: case series; <sup>f</sup> PS: pilot study; <sup>g</sup> RTX: rituximab; <sup>h</sup> BMB: belimumab; <sup>i</sup> CYC: cyclophosphamide; <sup>j</sup> CS: corticosteroids; <sup>k</sup> CR: complete response; <sup>l</sup> NR: not reported; <sup>m</sup> Anti-DsDNA: anti-double-stranded DNA titres; <sup>n</sup> SLEDAI: SLE Disease Activity Index; <sup>o</sup> MRS: modified Rankin Scale score; <sup>p</sup> PGA: physician's global assessment; <sup>q</sup> BILAG: British Isles Lupus Assessment Group global score; <sup>r</sup> ECLAM: European Consensus Lupus Activity Measurement; <sup>s</sup> UACR: urine albumin:creatinine ratio; <sup>t</sup> LRTI: lower respiratory tract infection; <sup>u</sup> URTI: upper respiratory tract infection<br><br><sup>v</sup> Clinical improvement in Hui-Yuen, 2015: defined as the treating physician's impression of a ≥50% improvement in the initial manifestation(s) being treated and the ability to taper existing steroids by at least 25% of the initial dose; laboratory response was defined as a ≥25% improvement in the levels of C3, C4, and/or a 25% decrease in anti-dsDNA<br><sup>w</sup> Complete renal remission in Trachana, 2013 defined as normalisation of all abnormal biological values resulting renal dysfunction (including albumin level, proteinuria (<500 mg/24h) and/or serum cystatin C levels)<br><sup>x</sup> CR in Olfat, 2015 defined as a platelet count >100 x10 <sup>9</sup> /l for pts with AITP; or Hb >= 120 g/l for pts with AIHA<br><sup>y</sup> Disease flare in Olfat, 2015 defined as any of the following following an initial CR: initial date or recurrence of symptomatic thrombocytopenia, failure to maintain platelet count >30 x 10 <sup>9</sup> /l, or anaemia with Hb <110 g/l with evidence of haemolysis<br><sup>z</sup> Adverse effects classified using Common Terminology Criteria for Adverse Events (CTCAE v4.0) |                                                      |                     |          |        |                   |

## Supplemental 2 – Main characteristics of the studies included for review

| Author          | Aim/Objective (comment)                                                                               | Study design<br>Time frame<br>Location<br>Setting                                                                                                                                           | Biological therapy dose                                                                                                                                                                                                                                                                                                                                                                                                                                                                  | Concomitant treatments during follow-up                                                                                                                                  | Length of follow-up                                                                     | Funding and conflicting interests                                  |
|-----------------|-------------------------------------------------------------------------------------------------------|---------------------------------------------------------------------------------------------------------------------------------------------------------------------------------------------|------------------------------------------------------------------------------------------------------------------------------------------------------------------------------------------------------------------------------------------------------------------------------------------------------------------------------------------------------------------------------------------------------------------------------------------------------------------------------------------|--------------------------------------------------------------------------------------------------------------------------------------------------------------------------|-----------------------------------------------------------------------------------------|--------------------------------------------------------------------|
| AlE'd (2014)    | To report the safety and efficacy of combined CYC and RTX treatment in Saudi children with SLE        | <ul style="list-style-type: none"> <li>- SRC</li> <li>- June 2007 – June 2012</li> <li>- Riyadh, Saudi Arabia</li> <li>- King Faisal Specialist Hospital and Research Center</li> </ul>     | <p>All pts: RTX 375 mg/m<sup>2</sup> on days 1 and 15; plus CYC 500 mg/m<sup>2</sup> on days 2 and 16</p> <p>All pts: pre-medicated with a single dose of 100 mg IV methylprednisolone immediately prior to RTX infusion</p> <p>All pts: pre-medicated with diphenhydramine and acetaminophen 30 mins prior to RTX infusion</p> <p>2 pts: 2 cycles of above regimen (second cycle 6 months after initial treatment)</p> <p>2 pts: 4 cycles with at least 6 months between each cycle</p> | <p>All pts: CS</p> <p>6 pts*: AZA</p> <p>5 pts*: MMF</p> <p>1 pt*: MTX</p> <p>1 pt*: ciclosporin</p> <p>*reported as previous and concurrent immunosuppressive drugs</p> | <p>Mean: 4.6 years</p> <p>Range: 1.2-13 years</p>                                       | <p>No conflict of interest reported</p> <p>Funding NR</p>          |
| Dale (2014)     | To assess the utility and safety of RTX in pediatric autoimmune and inflammatory disorders of the CNS | <ul style="list-style-type: none"> <li>- MRC</li> <li>- Time frame NR</li> <li>- International</li> <li>- 15 pediatric international centres with an interest in neuroimmunology</li> </ul> | <p>RTX 375 mg/m<sup>2</sup> /week x 4 weeks</p> <p>&gt;65% pts: pre-medication with antihistamine and CS (plus 18% with prophylactic antibiotics)</p> <p><b>in entire cohort</b> (JSLE and pts of other neurological autoimmune disease)</p>                                                                                                                                                                                                                                             | <p>17 pts*: CS</p> <p>14 pts*: MMF or AZA</p> <p>2 pts*: CYC</p> <p>6 pts*: HCQ</p> <p>*reported as previous and concurrent immunosuppressive drugs</p>                  | <p>Median: 1.7 years</p> <p>Range: 0.3 – 10 years</p> <p>Total of 307 patient-years</p> | <p>Conflict of interest NR</p> <p>No targeted funding reported</p> |
| Hui-Yuen (2015) | To evaluate the use and efficacy of BMB in academic SLE practices                                     | <ul style="list-style-type: none"> <li>- PC</li> <li>- Dates NR</li> <li>- USA and Sweden</li> </ul>                                                                                        | NR                                                                                                                                                                                                                                                                                                                                                                                                                                                                                       | <p>36 pts: HCQ</p> <p>32 pts: CS</p>                                                                                                                                     | 6 months                                                                                | No conflict of interest reported nor                               |

| Author        | Aim/Objective (comment)                                                                                                                                                  | Study design<br>Time frame<br>Location<br>Setting                                                          | Biological therapy dose                                                                                                                                                                                                                                                                                                                                                                           | Concomitant treatments during follow-up             | Length of follow-up                              | Funding and conflicting interests                     |
|---------------|--------------------------------------------------------------------------------------------------------------------------------------------------------------------------|------------------------------------------------------------------------------------------------------------|---------------------------------------------------------------------------------------------------------------------------------------------------------------------------------------------------------------------------------------------------------------------------------------------------------------------------------------------------------------------------------------------------|-----------------------------------------------------|--------------------------------------------------|-------------------------------------------------------|
|               |                                                                                                                                                                          | - 10 academic centres (9 in USA, 1 in Sweden)                                                              |                                                                                                                                                                                                                                                                                                                                                                                                   | 19 pts: MMF<br><br>9 pts: AZA<br><br>3 pts: ACE-i   |                                                  | funding reported                                      |
| Lehman (2014) | To evaluate the efficacy of a systematically administered course of RTX and CYC over an 18 month period to provide sustained improvement in CSLE                         | - PS<br>- 18 months but exact dates NR<br>- Location and setting NR                                        | All pts: RTX 750 mg/m <sup>2</sup> (max 1g per infusion) on days 0 and 14 followed 24h later by CYC 750 mg/m <sup>2</sup> on days 1 and 15<br><br>All pts: 3 cycles (i.e. RTX and CYC regimen described above) given at the start of the study, at 6 months and at 18 months<br><br>8 pts with active DPGN: additional CYC 750 mg/m <sup>2</sup> at 6, 10 and 14 weeks after the start of therapy | All pts: CS                                         | 60 months                                        | Funding NR<br><br>No conflict of interest reported    |
| Olfat (2015)  | To examine [their] experience<br>To determine the rate and durability of response to RTX<br>To evaluate [RTX's] safety in the CSLE population with refractory cytopenias | - SRC<br>- January 2003 – December 2012<br>- Toronto, Canada<br>- SLE clinic                               | 5 pts: RTX 375 mg/m <sup>2</sup> /week x 4 weeks (2 patients required 3 courses)<br><br>19 pts: RTX 1 dose of 500 mg/m <sup>2</sup> every 2 weeks (3 patients required 2 courses)                                                                                                                                                                                                                 | 17 pts: CS<br><br>5 pts: MMF<br><br>1 pt: CYC + MMF | Median: 29 months<br><br>IQR: 15-59 months       | No conflict of interest reported nor funding reported |
| Reis (2016)   | To report the efficacy and safety of RTX in patients diagnosed with JSLE [or JIA] refractory to conventional treatment                                                   | - CS<br>- January 2009 – January 2015<br>- Portugal<br>- Pediatric Rheumatology Unit of a central hospital | All 4 pts: RTX 750 mg/m <sup>2</sup> on days 0 and 15<br><br>1 pt: repeat of above at 10 months<br><br>1 pt: as above plus 375 mg/m <sup>2</sup> CYC on day 1; plus repeat cycle of RTX protocol at 8 months                                                                                                                                                                                      | All pts: CS and MMF<br><br>Unknown no. pts: HCQ     | Median: 21.5 months<br><br>Range: 12 – 70 months | NR                                                    |

| Author           | Aim/Objective (comment)                                                                                              | Study design<br>Time frame<br>Location<br>Setting                                                                                                                                       | Biological therapy dose                                                                                                                                                                                                                                                                                                                                                 | Concomitant treatments during follow-up                                                                                       | Length of follow-up                                                        | Funding and conflicting interests                         |
|------------------|----------------------------------------------------------------------------------------------------------------------|-----------------------------------------------------------------------------------------------------------------------------------------------------------------------------------------|-------------------------------------------------------------------------------------------------------------------------------------------------------------------------------------------------------------------------------------------------------------------------------------------------------------------------------------------------------------------------|-------------------------------------------------------------------------------------------------------------------------------|----------------------------------------------------------------------------|-----------------------------------------------------------|
| Tambralli (2015) | To investigate the safety and efficacy of RTX in a variety of pediatric autoimmune diseases, especially SLE          | <ul style="list-style-type: none"> <li>- SRC</li> <li>- August 2007 – April 2014</li> <li>- Alabama, USA</li> <li>- Children's Hospital of Alabama</li> </ul>                           | <p>All pts: RTX 750 mg/m<sup>2</sup> (max 1g) given on 2 separate occasions, 14 days apart</p> <p>All pts: pre-medicated with methylprednisone (2mg/kg – 30 mg/kg depending on underlying diagnosis and disease severity)</p> <p>All pts: pre-medicated with standard doses of acetaminophen and diphenhydramine</p> <p>Median number of courses: 2 (range of 1-11)</p> | <p>All pts: CS</p> <p>23 pts: CYC</p> <p>46 pts: any of AZA, HCQ, MTX, MMF</p> <p>1 pt: biologic (not named in the study)</p> | <p>Mean: 2.6 years ± 1.5 years (SD)</p> <p>Total of 132.2 person-years</p> | NR                                                        |
| Trachana (2013)  | To report [their] experience in treating pts with severe LN resistant to aggressive conventional therapies, with RTX | <ul style="list-style-type: none"> <li>- CS</li> <li>- April 2009 – October 2010</li> <li>- Northern Greece</li> <li>- Pediatric Immunology and Rheumatology Referral Centre</li> </ul> | <p>All pts: RTX 375-500 mg/m<sup>2</sup></p> <p>All pts: 4 infusions given 14-20 days apart</p> <p>All pts: pre-medicated with IV chlorphenamine, paracetamol, 125 mg methylprednisolone administered 30 min prior to each RTX infusion</p>                                                                                                                             | <p>All pts: CS and MMF</p> <p>1 pt: HCQ</p>                                                                                   | <p>Median: 16 months</p> <p>Range: 6 – 21 months</p>                       | <p>No conflict of interest reported</p> <p>Funding NR</p> |

| Author                                                                                                                                                                                                                                                                                                                                                                                                                                                                                                                                 | Aim/Objective (comment)                                                                                            | Study design<br>Time frame<br>Location<br>Setting                                                                                                                                       | Biological therapy dose                                                                                                                                                                                                                                                                                                                                       | Concomitant treatments during follow-up                                                                                                                                                                                                                                                                                                                       | Length of follow-up                                  | Funding and conflicting interests                                                                                                                                                                                                      |
|----------------------------------------------------------------------------------------------------------------------------------------------------------------------------------------------------------------------------------------------------------------------------------------------------------------------------------------------------------------------------------------------------------------------------------------------------------------------------------------------------------------------------------------|--------------------------------------------------------------------------------------------------------------------|-----------------------------------------------------------------------------------------------------------------------------------------------------------------------------------------|---------------------------------------------------------------------------------------------------------------------------------------------------------------------------------------------------------------------------------------------------------------------------------------------------------------------------------------------------------------|---------------------------------------------------------------------------------------------------------------------------------------------------------------------------------------------------------------------------------------------------------------------------------------------------------------------------------------------------------------|------------------------------------------------------|----------------------------------------------------------------------------------------------------------------------------------------------------------------------------------------------------------------------------------------|
| Watson (2015)                                                                                                                                                                                                                                                                                                                                                                                                                                                                                                                          | To describe the clinical indications, efficacy and adverse events for RTX in a large cohort of children with lupus | <ul style="list-style-type: none"> <li>- MRC</li> <li>- August 2003 – March 2013</li> <li>- UK</li> <li>- Great Ormond Street and Alder Hey Children's NHS Foundation Trusts</li> </ul> | <p>All pts: RTX 750 mg/m<sup>2</sup> given on 2 separate occasions, 14 days apart</p> <p>46 pts: as above plus 375 mg/m<sup>2</sup> CYC prior to each dose of RTX</p> <p>19 pts: received &gt;1 course of RTX (mean of 3.2; range of 2-6)</p> <p>1 pt received: 3 doses of RTX 750 mg/m<sup>2</sup> given 2 weeks apart during repeat course of treatment</p> | <p>5/104 courses: plasma exchange</p> <p>2/104 courses: pulsed IV CS</p> <p>2/104 courses: IVIg</p> <p>At initial treatment 26/57 pts: combination of &gt;= 2 immunosuppressants (any 2 of: AZA, MMF, monthly CYC, ciclosporin, IVIg, infliximab, MTX, etanercept, tacrolimus, plasma exchange or thalidomide)</p> <p>At initial treatment: 53/57 pts: CS</p> | <p>Median: 2.5 months</p> <p>IQR: 1.6-4.3 months</p> | <p>No conflict of interest reported</p> <p>LW received funding through an academic clinical lectureship from NIHR</p> <p>Financial support from Lupus UK for the coordination and database development of the UK JSLE Cohort Study</p> |
| MRC: multi-centre retrospective cohort; SRC: single-centre retrospective cohort; PC: prospective cohort; CS: case series; PS: pilot study; DPGN: diffuse proliferative glomerulonephritis; RTX: rituximab; BMB: belimumab; CYC: cyclophosphamide; ASA: azathioprine; CS: corticosteroids; MMF: mycophenolate mofetil; HCQ: hydroxychloroquine; MTX: methotrexate; IVIg: intravenous immunoglobulin; IQR: interquartile range; SD: standard deviation; NR: not reported; LW: Louise Watson; NIHR: National Institute of Health Research |                                                                                                                    |                                                                                                                                                                                         |                                                                                                                                                                                                                                                                                                                                                               |                                                                                                                                                                                                                                                                                                                                                               |                                                      |                                                                                                                                                                                                                                        |

### Supplemental 3 – Characteristics of participants from the included studies

| Author          | Total No. Participants                                                          | Gender              | Race                                 | Age at diagnosis                                                                  | Disease duration before intervention with biologic                               | Age at intervention with biologic                                                                                          | Disease manifestations at initiation of biological therapy                                                                                          | Previous treatments                                                                                                                                               |
|-----------------|---------------------------------------------------------------------------------|---------------------|--------------------------------------|-----------------------------------------------------------------------------------|----------------------------------------------------------------------------------|----------------------------------------------------------------------------------------------------------------------------|-----------------------------------------------------------------------------------------------------------------------------------------------------|-------------------------------------------------------------------------------------------------------------------------------------------------------------------|
| AIE'd (2014)    | 16                                                                              | 13 female<br>3 male | NR                                   | Mean: 8.1 years $\pm$ 3.4 years (SD)                                              | NR<br><br>Mean disease duration reported as: mean 4.7 years $\pm$ 3.2 years (SD) | Biologic: RTX<br><br>NR                                                                                                    | 8 pts: LN nephritis (class IV and/or V)<br><br>3 pts: cerebritis<br><br>3 pts: polyarthritis<br><br>2 pts: mucocutaneous disease<br><br>1 pts: AITP | All pts: CS<br><br>6 pts*: AZA<br><br>5 pts*: MMF<br><br>1 pt*: MTX<br><br>1 pt*: ciclosporin<br><br>*reported as previous and concurrent immunosuppressive drugs |
| Dale (2014)     | 18 NPSLE pts (out of a cohort of 144 pts with pediatric autoimmune CNS disease) | 17 female<br>1 male | NR                                   | Age at presentation reported<br><br>Median: 13.0 years<br><br>Range: 8 – 17 years | Median: 0.2 years<br><br>Range: 0.05 – 6 years                                   | Biologic: RTX<br><br>Specific to NPSLE<br>NR (in general cohort median age was 9.9 years with a range of 1.6 – 17.9 years) | All pts: NPSLE                                                                                                                                      | 17 pts: CS<br><br>9 pts: IVIG<br><br>9 pts: CYC<br><br>4 pts: plasma exchange<br><br>4 pts: MMF/AZA<br><br>4 pts: HCQ                                             |
| Hui-Yuen (2015) | 39 (out of a cohort of 195 ASLE and JSLE pts)                                   | 35 female<br>4 male | 18 Caucasian<br>19 Black<br>2 Asian  | Mean: 14 years $\pm$ 4 years (SD)                                                 | Mean: 12 years $\pm$ 8 years (SD)                                                | Biologic: BMB<br><br>Mean: 27 years $\pm$ 7 years (SD)                                                                     | 18 pts: arthritis<br><br>15 pts: renal disease<br><br>14 pts: rash<br><br>13 pts: constitutional symptoms                                           | NR<br><br>Concomitant medications reported, which included CS, HCQ, MMF, AZA, ACE-i                                                                               |
| Lehman (2014)   | 12                                                                              | 9 female<br>3 male  | 5 Caucasian<br>4 Hispanic<br>3 Asian | Mean: 12.5 years                                                                  | NR                                                                               | Biologic: RTX<br><br>Mean: 16 years                                                                                        | 8 pts: active DPGN<br><br>4 pts: systemic symptoms                                                                                                  | All pts: CS<br><br>Range of other treatments                                                                                                                      |

| Author           | Total No. Participants                                          | Gender              | Race                                                              | Age at diagnosis                             | Disease duration before intervention with biologic                                                                                   | Age at intervention with biologic                                     | Disease manifestations at initiation of biological therapy                                                                                                                                                                   | Previous treatments                                                                                                                             |
|------------------|-----------------------------------------------------------------|---------------------|-------------------------------------------------------------------|----------------------------------------------|--------------------------------------------------------------------------------------------------------------------------------------|-----------------------------------------------------------------------|------------------------------------------------------------------------------------------------------------------------------------------------------------------------------------------------------------------------------|-------------------------------------------------------------------------------------------------------------------------------------------------|
|                  |                                                                 |                     |                                                                   |                                              |                                                                                                                                      | Range: 10-28 years                                                    | (not specifically reported)                                                                                                                                                                                                  | including MMF, CYC, HCQ, ACE-i– but not specifically reported                                                                                   |
| Olfat (2015)     | 24                                                              | 18 female<br>6 male | NR                                                                | NR                                           | Median: 3.0 years<br><br>IQR: 1 - 14 years                                                                                           | Biologic: RTX<br><br>Median: 13.2 years<br><br>IQR: 10.5 – 15.9 years | 16 pts: AITP<br><br>5 pts: AIHA<br><br>3 pts: AITP and AIHA<br><br>Of note: 16 pts also had arthritis; 10 pts also had oral and/or nasal ulcers                                                                              | 23 pts: CS<br><br>18 pts: IVIG<br><br>6 pts: other immunosuppressants (any agent or combination of AZA, MTX, MMF, CYC)<br><br>1 pt: splenectomy |
| Reis (2016)      | 4 (out 5 pts; one of whom had JIA)                              | 4 female            | 3 Caucasian<br>1 Black                                            | Median: 10 years<br><br>Range: 10 - 17 years | Median: 6.5 years<br><br>Range: 5 months – 15 years                                                                                  | Biologic: RTX<br><br>Median: 17 years<br><br>Range: 16 – 25 years     | 3 pts: class <sup>a</sup> IV LN<br><br>1 pt: multisystem involvement                                                                                                                                                         | All pts: CS (oral and IV)<br><br>3 pts: CYC<br><br>3 pts: MMF<br><br>3 pts: HCQ<br><br>2 pts: AZA                                               |
| Tambralli (2015) | 50 (out of 104 children with JSLE and other rheumatic diseases) | 41 female<br>9 male | 9 white<br>38 African-American<br>2 Hispanic or Latino<br>1 Asian | NR                                           | Mean: 1.6 years ± 1.3 years (SD) for the 30 pts who had refractory disease<br><br>(20 remaining pts received RTX as initial therapy) | Biologic: RTX<br><br>Mean: 13.6 years ± 3.5 years (SD)                | 22 pts: LN (all class <sup>a</sup> II or above, with 32% of these patients having class <sup>a</sup> IV disease and 28% having mixed class <sup>a</sup> III/IV)<br><br>Remaining 28 pts: no specific manifestations reported | All pts: CS<br><br>3 pts: biologics (agent not specified)<br><br>32 pts: (any agent or combination of: AZA, HCQ, MTX, MMF)<br><br>4 pts: CYC    |
| Trachana (2013)  | 4                                                               | 4 males             | NR                                                                | Mean: 12 years<br><br>Range: 7-14 years      | Range: 2-89 months                                                                                                                   | Biologic: RTX<br><br>Mean: 15 years<br><br>Range: 11-18 years         | All pts: LN<br><br>1 pt: class <sup>a</sup> III focal proliferative LN<br><br>1 pt: class <sup>a</sup> IV and V                                                                                                              | All pts: CS and CYC<br><br>3 pts: MMF<br><br>2 pts: AZA                                                                                         |



| Author                                                                                                                                                                                                                                                                                                                                                                                                                                                                                                                                              | Total No. Participants | Gender               | Race                                                                  | Age at diagnosis                                 | Disease duration before intervention with biologic | Age at intervention with biologic                                     | Disease manifestations at initiation of biological therapy                                                                                                                                                                                                                                                                                                                                                                                                                                                                                                                  | Previous treatments                                                                                                                                                                                                                                                  |
|-----------------------------------------------------------------------------------------------------------------------------------------------------------------------------------------------------------------------------------------------------------------------------------------------------------------------------------------------------------------------------------------------------------------------------------------------------------------------------------------------------------------------------------------------------|------------------------|----------------------|-----------------------------------------------------------------------|--------------------------------------------------|----------------------------------------------------|-----------------------------------------------------------------------|-----------------------------------------------------------------------------------------------------------------------------------------------------------------------------------------------------------------------------------------------------------------------------------------------------------------------------------------------------------------------------------------------------------------------------------------------------------------------------------------------------------------------------------------------------------------------------|----------------------------------------------------------------------------------------------------------------------------------------------------------------------------------------------------------------------------------------------------------------------|
|                                                                                                                                                                                                                                                                                                                                                                                                                                                                                                                                                     |                        |                      |                                                                       |                                                  |                                                    |                                                                       | glomerulonephritis; anaemia<br><br>1 pt: class <sup>a</sup> II LN; CNS involvement; anaemia; leucopaenia<br><br>1 pt: class <sup>a</sup> II and V LN                                                                                                                                                                                                                                                                                                                                                                                                                        | 1 pt: HCQ                                                                                                                                                                                                                                                            |
| Watson (2015)                                                                                                                                                                                                                                                                                                                                                                                                                                                                                                                                       | 63                     | 50 female<br>13 male | 23 White<br>19 Black<br>African/Caribbean<br>20 Asian<br>1 mixed race | Median: 12.2. years<br><br>IQR: 9.0 – 13.9 years | Median: 1.4 years<br><br>IQR: 0.2 – 3.0 years      | Biologic: RTX<br><br>Median: 14.4 years<br><br>IQR: 12.0 – 15.5 years | 38 pts: renal disease<br><br>20 pts: general symptoms (fever, lethargy, malaise, rashes)<br><br>8 pts: vasculitis<br><br>7 pts: bone pain / arthritis / arthralgia<br><br>5 pts each for :<br>gastrointestinal disease and cerebral disease<br><br>4 pts each for: cardiac involvement, AITP, not clearly documented<br><br>Note: the above values are for all courses of RTX, values differ slightly for pts receiving their first course although renal disease and general symptoms remain the 1 <sup>st</sup> and 2 <sup>nd</sup> most common indications, respectively | 53/57 pts: oral CS<br><br>26/57 pts: combination of 2 immunosuppressive agents (any 2 of: AZA, MMF, CYC, ciclosporin, IVIG, infliximab, MTX, etanercept, tacrolimus, plasma exchange, thalidomide)<br>Note: only 57/63 pts had complete medication details available |
| <sup>a</sup> Nephritis WHO class; ASLE: adult-onset SLE; NPSLE: neuropsychiatric SLE; NR: not reported; SD: standard deviations; IQR: interquartile range; RTX: rituximab; BMB: belimumab; LN: lupus nephritis; DPGN: diffuse proliferative glomerulonephritis; AITP: autoimmune thrombocytopaenia; AIHA: autoimmune haemolytic anaemia; CS: corticosteroids; AZA: azathioprine; HCQ: hydroxychloroquine; MTX: methotrexate; MMF: mycophenolate mofetil; CYC: cyclophosphamide; ACE-i: ACE-inhibitors; IVIG: intravenous immunoglobulin replacement |                        |                      |                                                                       |                                                  |                                                    |                                                                       |                                                                                                                                                                                                                                                                                                                                                                                                                                                                                                                                                                             |                                                                                                                                                                                                                                                                      |

## Supplemental 4 – Quality Assessment of Included Studies

| Author          | Study type | Clear rationale and objective | Description of enrolment process | Inclusion and exclusion criteria specified |           | Results reported in terms of statistical significance | Ethical approval | Risk of bias (comments)                                                                                                                                                                                                                                                                                                                                                                                                                                                                                                                                                                                                                                                                                                                                                                                                                                     |
|-----------------|------------|-------------------------------|----------------------------------|--------------------------------------------|-----------|-------------------------------------------------------|------------------|-------------------------------------------------------------------------------------------------------------------------------------------------------------------------------------------------------------------------------------------------------------------------------------------------------------------------------------------------------------------------------------------------------------------------------------------------------------------------------------------------------------------------------------------------------------------------------------------------------------------------------------------------------------------------------------------------------------------------------------------------------------------------------------------------------------------------------------------------------------|
|                 |            |                               |                                  | Inclusion                                  | Exclusion |                                                       |                  |                                                                                                                                                                                                                                                                                                                                                                                                                                                                                                                                                                                                                                                                                                                                                                                                                                                             |
| AlE'ed (2014)   | SRC        | ✓                             | ✓                                | ✓                                          | NR        | ✓                                                     | ✓                | Low <ul style="list-style-type: none"> <li>- Single-centre study but there was complete, consecutive inclusion of all patients with JSLE meeting the inclusion criteria</li> <li>- Age &lt;14 years at diagnosis may have excluded several patients whose outcomes may have been relevant to this study</li> <li>- Likely positive selection and detection bias due to retrospective and non-blinded nature of the study</li> <li>- Reporting bias in discussion of lymphocyte assays for B cell depletion that were only available for 5/16 patients</li> <li>- Uncontrolled study: different co-interventions</li> </ul>                                                                                                                                                                                                                                  |
| Dale (2014)     | MRC        | ✓                             | ✓                                | NR                                         | NR        | ✗                                                     | ✓                | Serious <ul style="list-style-type: none"> <li>- Includes paediatric patients of other neurological autoimmune diseases</li> <li>- Very restricted patient group (JSLE patients with NPSLE)</li> <li>- Some important outcomes cannot be directly extrapolated as they are reported with patients of other neurological autoimmune diseases (haematological infectious side effects, infusion adverse events, residual impairment)</li> <li>- Non-validated tool for JSLE used to assess clinical response (mRS) leading to subjective reporting bias</li> <li>- Incomplete data for B cell depletion although this is reported within the study as an outcome</li> <li>- Non-standardised approach to treatment and monitoring</li> <li>- Likely positive selection and detection bias due to retrospective and non-blinded nature of the study</li> </ul> |
| Hui-Yuen (2015) | PC         | ✓                             | ✓                                | ✓                                          | ✓         | ✓                                                     | ✓                | Moderate <ul style="list-style-type: none"> <li>- Multi-centre study with 39 JSLE patients in a cohort of 195 patients</li> <li>- Some data cannot be reliably extrapolated as it does not differentiate between the adult-onset and juvenile-onset SLE patients (no qualification of clinical outcome score, no safety data distinguishable for JSLE patients)</li> <li>- Possible attrition bias: 9 patients discontinued belimumab and it is unclear whether their outcomes are included in statistical analysis and</li> </ul>                                                                                                                                                                                                                                                                                                                          |

| Author           | Study type | Clear rationale and objective | Description of enrolment process | Inclusion and exclusion criteria specified |           | Results reported in terms of statistical significance | Ethical approval                     | Risk of bias (comments)                                                                                                                                                                                                                                                                                                                                                                                                                                                                                                                                                  |
|------------------|------------|-------------------------------|----------------------------------|--------------------------------------------|-----------|-------------------------------------------------------|--------------------------------------|--------------------------------------------------------------------------------------------------------------------------------------------------------------------------------------------------------------------------------------------------------------------------------------------------------------------------------------------------------------------------------------------------------------------------------------------------------------------------------------------------------------------------------------------------------------------------|
|                  |            |                               |                                  | Inclusion                                  | Exclusion |                                                       |                                      |                                                                                                                                                                                                                                                                                                                                                                                                                                                                                                                                                                          |
|                  |            |                               |                                  |                                            |           |                                                       |                                      | <i>whether any of these were JSLE patients</i><br>- Uncontrolled study: different cointerventions<br>- Likely detection bias due to non-blinded nature of the study                                                                                                                                                                                                                                                                                                                                                                                                      |
| Lehman (2014)    | PS         | ✓                             | ✓                                | ✓                                          | NR        | ✓                                                     | NR (but informed consent was gained) | Low<br>- Controlled, standardised interventions over 5 years<br>- Likely positive selection and detection bias due to non-blinded nature of the study                                                                                                                                                                                                                                                                                                                                                                                                                    |
| Olfat (2015)     | SRC        | ✓                             | ✓                                | ✓                                          | NR        | ✓                                                     | ✓                                    | Moderate<br>- Single-centre study with a limited no. patients<br>- Very restricted patient group (JSLE with cytopenias)<br>- Likely positive selection, detection and reporting bias due to retrospective and non-blinded nature of the study<br>- Missing data on B cell depletion<br>- Uncontrolled study: different doses of RTX administered; different co-interventions                                                                                                                                                                                             |
| Reis (2016)      | CS         | ✓                             | ✓                                | ✓                                          | NR        | ✗                                                     | ✓                                    | Moderate<br>- 5 cases only (4 of whom with JSLE)<br>- Likely positive selection, detection and reporting biases due to retrospective and non-blinded nature of the study<br>- Uncontrolled study: different number of RTX cycles, different co-interventions and different immunosuppressants after RTX intervention<br>- 1 patient emigrated to France during the study and returned requiring further immunosuppressant agents                                                                                                                                         |
| Tambralli (2015) | SRC        | ✓                             | ✓                                | ✓                                          | NR        | ✓                                                     | ✓                                    | Moderate<br>- Single-centre study with a limited number of patients – conclusions drawn may not be directly applicable JSLE patients<br>- Includes paediatric patients of other rheumatic diseases but relevant data was extrapolated and the author was contacted directly for other relevant data<br>- Some important outcomes cannot be directly extrapolated as they are reported with patients of other paediatric rheumatic disease (adverse events, B cell depletion, hypogammaglobulinaemia)<br>- Likely positive selection, detection and reporting bias due to |

| Author                                                                                                                                                                         | Study type | Clear rationale and objective | Description of enrolment process | Inclusion and exclusion criteria specified |           | Results reported in terms of statistical significance | Ethical approval | Risk of bias (comments)                                                                                                                                                                                                                                                                                                                                    |
|--------------------------------------------------------------------------------------------------------------------------------------------------------------------------------|------------|-------------------------------|----------------------------------|--------------------------------------------|-----------|-------------------------------------------------------|------------------|------------------------------------------------------------------------------------------------------------------------------------------------------------------------------------------------------------------------------------------------------------------------------------------------------------------------------------------------------------|
|                                                                                                                                                                                |            |                               |                                  | Inclusion                                  | Exclusion |                                                       |                  |                                                                                                                                                                                                                                                                                                                                                            |
|                                                                                                                                                                                |            |                               |                                  |                                            |           |                                                       |                  | <i>retrospective and non-blinded nature of the study</i><br>- <i>Uncontrolled study: different co-interventions</i>                                                                                                                                                                                                                                        |
| Trachana (2013)                                                                                                                                                                | CS         | ✓                             | ✓                                | ✓                                          | NR        | ✖                                                     | ✓                | Moderate<br>- 4 cases only<br>- Likely positive selection, detection and reporting bias due to retrospective and non-blinded nature of the study<br>- Uncontrolled study: different doses of RTX administered, different co-interventions                                                                                                                  |
| Watson (2015)                                                                                                                                                                  | MRC        | ✓                             | ✓                                | ✓                                          | NR        | ✓                                                     | NRQ              | Low<br>- 2 centre study but also used UK JSLE Cohort Study database<br>- Likely positive selection, detection and reporting bias due to retrospective and non-blinded nature of the study<br>- Uncontrolled study: different co-interventions<br>- Some data is missing but only data on patients for whom results were retrieved was included in analysis |
| MRC: multi-centre retrospective cohort; SRC: single-centre retrospective cohort; PC: prospective cohort; CS: case series; PS: pilot study; NR: not reported; NRQ: not required |            |                               |                                  |                                            |           |                                                       |                  |                                                                                                                                                                                                                                                                                                                                                            |

## Supplemental 5 – Ongoing trials

| Trial                                                                                                           | Study design                                                                                                                                                         | Completion date                                                                                                                                                                                                                                                                                                                                            | Intervention                                                                                                                                                                                                | Inclusion criteria                                                                                                                                                                                                                                    | Primary outcome measures                                                                                                                                                                                                                                                                                                                                                                      |
|-----------------------------------------------------------------------------------------------------------------|----------------------------------------------------------------------------------------------------------------------------------------------------------------------|------------------------------------------------------------------------------------------------------------------------------------------------------------------------------------------------------------------------------------------------------------------------------------------------------------------------------------------------------------|-------------------------------------------------------------------------------------------------------------------------------------------------------------------------------------------------------------|-------------------------------------------------------------------------------------------------------------------------------------------------------------------------------------------------------------------------------------------------------|-----------------------------------------------------------------------------------------------------------------------------------------------------------------------------------------------------------------------------------------------------------------------------------------------------------------------------------------------------------------------------------------------|
| Pediatric Lupus Trial of Belimumab Plus Background Standard Therapy (PLUTO) NCT01649765*                        | <ul style="list-style-type: none"> <li>Phase II</li> <li>Multi-centre</li> <li>Interventional</li> <li>RCT double-blind</li> </ul>                                   | <ul style="list-style-type: none"> <li>3 phases <ul style="list-style-type: none"> <li>52-week randomized, placebo-controlled, double-blind phase with primary completion in April 2018</li> <li>Long term open label continuation phase (5 - 10 years from commencing belimumab therapy)</li> <li>Long term safety follow-up phase</li> </ul> </li> </ul> | <ul style="list-style-type: none"> <li>Experimental: belimumab 10mg/kg IV monthly</li> <li>Control: placebo 250ml of normal saline</li> <li>Both arms on background standard therapy</li> </ul>             | <ul style="list-style-type: none"> <li>5 years to 17 years of age at enrolment</li> <li>SELENA SLEDAI score <math>\geq 6</math></li> <li>Positive anti-nuclear antibody (ANA) test results</li> </ul>                                                 | <ul style="list-style-type: none"> <li>SLE Response Index</li> <li><math>\geq 4</math> point reduction from baseline in SELENA SLEDAI score</li> </ul>                                                                                                                                                                                                                                        |
| Trial of Rituximab and Mycophenolate Mofetil Without Oral Steroids for Lupus Nephritis (RITUXILUP) NCT01773616* | <ul style="list-style-type: none"> <li>Phase III</li> <li>Multi-centre</li> <li>Interventional</li> <li>Open label</li> <li>Randomized, controlled trial</li> </ul>  | <ul style="list-style-type: none"> <li>April 2019</li> </ul>                                                                                                                                                                                                                                                                                               | <ul style="list-style-type: none"> <li>Experimental: rituximab, methyl prednisolone and mycophenolate mofetil</li> <li>Control: oral prednisolone, methyl prednisolone and mycophenolate mofetil</li> </ul> | <ul style="list-style-type: none"> <li>Adults aged 18-75 years old and children aged 12-17 years old</li> <li>Active lupus nephritis: class III, IV or V, plus urine protein-to-creatinine ratio <math>&gt;100\text{mg}/\text{mmol}</math></li> </ul> | <ul style="list-style-type: none"> <li>Complete renal response without the need to prescribe oral steroids within 1 year</li> </ul>                                                                                                                                                                                                                                                           |
| Rituximab for Lupus Nephritis With Remission as a Goal (RING) NCT01673295*                                      | <ul style="list-style-type: none"> <li>Phase III</li> <li>Single centre</li> <li>Interventional</li> <li>Open label</li> <li>Randomised, controlled trial</li> </ul> | <ul style="list-style-type: none"> <li>November 2016</li> </ul>                                                                                                                                                                                                                                                                                            | <ul style="list-style-type: none"> <li>Experimental: RTX infusion + Standard of Care</li> <li>Control: standard of care only</li> </ul>                                                                     | <ul style="list-style-type: none"> <li>Age <math>\geq 15</math> years</li> <li>SLE, according to ACR and/or SLICC criteria</li> </ul>                                                                                                                 | <ul style="list-style-type: none"> <li>Percentage of patients achieving renal complete response (CR) at week 104 <ul style="list-style-type: none"> <li>Urine P/C ratio <math>\leq 0.5\text{ mg}/\text{mg}</math></li> <li>eGFR <math>\geq 60\text{ml}/\text{min}</math></li> <li>No increase of glucocorticoids</li> <li>No introduction of another immunosuppressant</li> </ul> </li> </ul> |

\* ClinicalTrials.gov Identifier
